# Supplementary figures and images for: Blood Telomere Length Attrition and Cancer Development in the Normative Aging Study Cohort
Source: PubMed Central journal article supplement — eBioMedicine. 2015 Apr 13;2(6):591–6. doi: 10.1016/j.ebiom.2015.04.008 (PMC4535161; doi:10.1016/j.ebiom.2015.04.008), 2015-04-13

Blood telomere length (BTL)

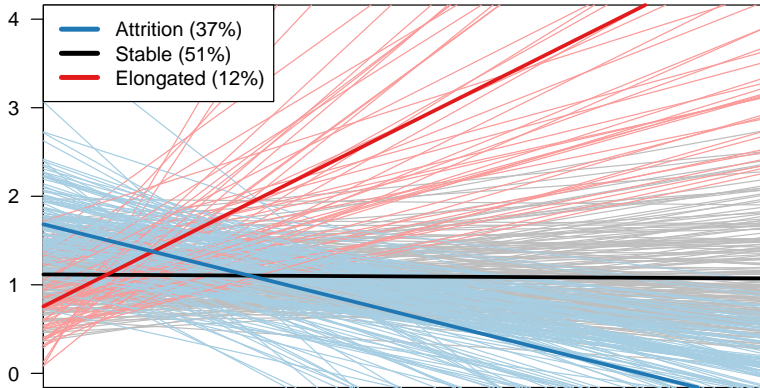

Supplement: mmc1.pdf [file mmc1.pdf]
